# Supplementary material for: Neofusicoccum mediterraneum Is Involved in a Twig and Branch Dieback of Olive Trees Observed in Salento (Apulia, Italy)
Source: MDPI journal article supplement (doi:10.3390/pathogens11010053), 2022-01-02

Title:

Twig and branch dieback of olive trees in Salento (Apulia, Italy) caused by *Neofusicoccum mediterraneum*

Journal name:

Pathogens - MDPI

Authors:

Angela Brunetti, Antonio Matere, Valentina Lumia, Vittorio Pasciuta, Valeria Fusco, Domenico Sansone, Paolo Marangi, Nicola Cristella, Francesco Faggioli, Marco Scortichini and Massimo Pilotti

Corresponding author:

Massimo Pilotti

Affiliation:

Institution: Council for Agricultural Research and Economics; Department: Research Center for Plant Protection and Certification (CREA-DC) - Via C. G. Bertero 22, 00156 Rome, Italy

E-mail address:

[massimo.pilotti@crea.gov.it](mailto:massimo.pilotti@crea.gov.it)

**Figure S2** Maximum (red) minimum (azure) and average (grey) temperatures occurred during the pathogenicity tests (inoculations on twigs were on 17 May and 16 June 2021, inoculations on stems were on 17 June 2021)

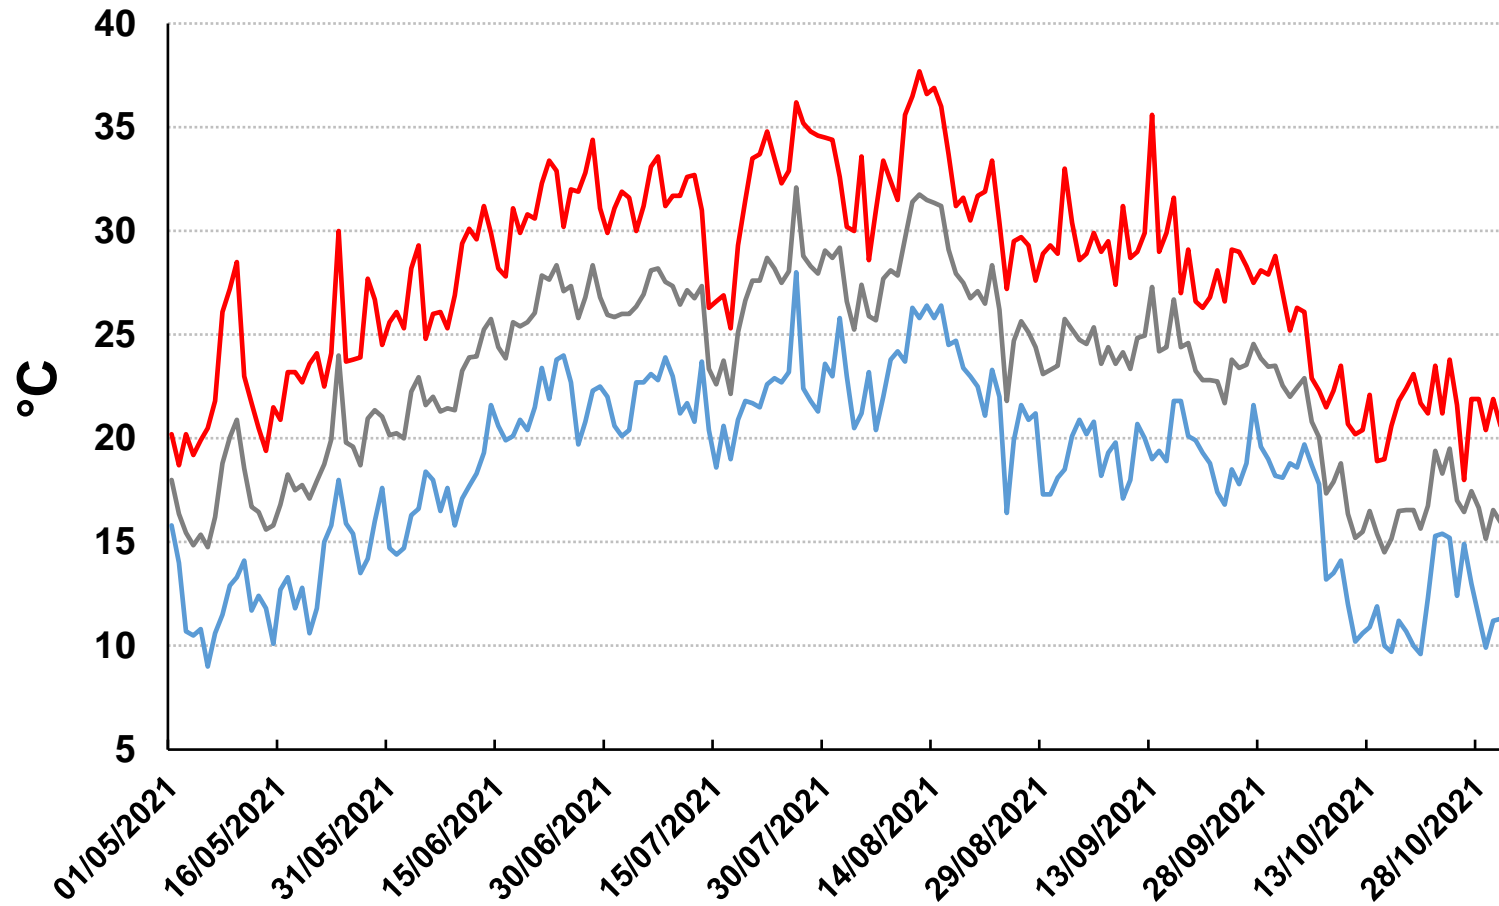

Supplement: s1 [file s1]
