# Supplementary material for: Neofusicoccum mediterraneum Is Involved in a Twig and Branch Dieback of Olive Trees Observed in Salento (Apulia, Italy)
Source: MDPI journal article supplement (doi:10.3390/pathogens11010053), 2022-01-02
Supplement: s1 [file s1]

Title:

Twig and branch dieback of olive trees in Salento (Apulia, Italy) caused by *Neofusicoccum mediterraneum*

Journal name:

Pathogens - MDPI

Authors:

Angela Brunetti, Antonio Matere, Valentina Lumia, Vittorio Pasciuta, Valeria Fusco, Domenico Sansone, Paolo Marangi, Nicola Cristella, Francesco Faggioli, Marco Scortichini and Massimo Pilotti

Corresponding author:

Massimo Pilotti

Affiliation:

Institution: Council for Agricultural Research and Economics; Department: Research Center for Plant Protection and Certification (CREA-DC) - Via C. G. Bertero 22, 00156 Rome, Italy

E-mail address:

[massimo.pilotti@crea.gov.it](mailto:massimo.pilotti@crea.gov.it)

**Text/Table S1** Methods for DNA extraction, PCR amplifications and sequencing of DNA regions of *Neofusicoccum mediterraneum* isolated from olive trees in Apulia (Italy). In Table A the DNA regions amplified and primers used are reported. In Table B the thermal cycling for each DNA region is described.

Below sequences generated in this study and their accession numbers are also listed.

Genomic DNA (gDNA) of fungal isolates was obtained from 100 mg mycelium sampled from axenic cultures actively growing on sterile cellophane discs (BIO-RAD, Hercules, CA, USA) layered on PDA plates and collected by scraping with a sterile pipette tip. Mycelium samples were powdered with liquid nitrogen, then gDNA was extracted using a DNeasy Plant Mini Kit (Qiagen, Hilden, Germany) following the manufacturer's instructions.

PCR amplifications were carried out on a PCR T100™ Thermal Cycler (BIO-RAD). Reaction assembly was in 50µl volume and contained each primer at 0.2 µM, 2.5 U of High Fidelity Platinum Taq DNA Polymerase (Invitrogen, Thermo Fisher Scientific, Waltham, MA, USA), 0.2 mM (ITS) or 0.4 mM (TUB2 e TEF1-α) of each dNTP, in the buffer supplied by the Taq polymerase manufacturer.

Primer sequences and citations are reported in table A. Thermal cycling is reported in table B.

The PCR products were analysed by agarose gel electrophoresis, excised from gel, and eluted with ISOLATE II PCR and gel kit (Meridian Bioscience, River Hills Drive, Cincinnati, OH, USA) following the manufacturer's instructions. Then amplicons were directly sequenced in both directions by Sanger technology (Bio-Fab research s.r.l. Rome Italy).

**Table S1A.** DNA regions amplified and primers used

| DNA region     | Forward primer                   | Sequence                       | Reverse primer    | Sequence                       | Citation                               |
|----------------|----------------------------------|--------------------------------|-------------------|--------------------------------|----------------------------------------|
| ITS            | ITS5                             | 5'-GGAAGTAAAAGTCGTAACAAGG-3'   | ITS4              | 5'-TCCTCCGCTTATTGATATGC-3'     | [33]                                   |
| TEF1- $\alpha$ | EF688F                           | 5'-CGGTCACCTTGATCTACAAGTG C-3' | EF1251R           | 5'-CCTCGAACTCACCAGTACCG-3'     | [34]                                   |
| TUB2           | T1- $\beta$ tubulin <sup>1</sup> | 5'-AACATGCGTGAGATTGTAAGT-3'    | Bt2b <sup>2</sup> | 5'-ACCCTCAGTGTAGTGACCCTTGGC-3' | <sup>1</sup> [35]<br><sup>2</sup> [36] |

**Table S1B.** Thermal cycling (35 cycles) to amplify DNA regions used for fungal identification (Blast and phylogeny)

| Loci DNA       | Initial denaturation | Denaturation for each cycle | Annealing | Extension      | Final extension |
|----------------|----------------------|-----------------------------|-----------|----------------|-----------------|
| ITS            | 94°C, 3min           | 94°C, 30s                   | 50°C, 30s | 68°C, 1min 15s | 68°C, 10min     |
| TEF1- $\alpha$ | 94°C, 3min           | 94°C, 30s                   | 55°C, 45s | 68°C, 1min 30s | 68°C, 10min     |
| TUB2           | 94°C, 3min           | 94°C, 30s                   | 50°C, 30s | 68°C, 1min     | 68°C, 10min     |

## References

33. White, T.J.; Bruns, T.; Lee, S.; Taylor, J. Amplification and direct sequencing of fungal ribosomal RNA genes for phylogenetics. In *PCR protocols: a guide to methods and applications*; Innis, M.A., Gelfand, D.H., Sninsky, J.J., White, T.J., Eds.; Academic Press Inc., London, United Kingdom, 1990; pp. 315-322. Doi: 10.1016/B978-0-12-372180-8.50042-1
34. Alves, A.; Crous, P.W.; Correia, A.; Phillips, A.J.L. Morphological and molecular data reveal cryptic speciation in *Lasioidiplodia theobromae*. *Fungal Divers.* **2008**, *28*, 1-13.
35. Glass, N.L.; Donaldson, G. Development of primer sets designed for use with PCR to amplify conserved genes from filamentous ascomycetes. *Appl. Environ. Microbiol.* **1995**, *61*, 1323-1330. Doi: 10.1128/aem.61.4.1323-1330.1995
36. O'Donnell, K.; Cigelnik, E. Two divergent intragenomic rDNA ITS2 types within a monophyletic lineage of the fungus *Fusarium* are nonorthologous. *Mol. Phylogenet. Evol.* **1997**, *7*(1), 103-116. Doi: 10.1006/mpev.1996.0376

## Sequences:

>OL454501\_CREA-DC TPR OL.427\_ITS

TTTCCGTAGGTGAACCTGCGGAAGGATCATTACCGAGTTGACTCGAGCTCCGGCTCGACTCTCCACCCCTATGTGTACCT  
ACCTCTGTTGCTTTGGCGGGCCGCGGTCTCCGCACCGGCCCCCTTCGGGGGGCTGGCCAGCGCCCGCCAGAGGACCAC  
AAAATCCAGTCAGTAAACGTCGCAGTCTGAAAAACAAGTTAATAAACTAAAATTTCAACAACGGATCTCTTGTTCTG  
GCATCGATGAAGAACGCAGCGAAATGCGATAAGTAATGTGAATTGCAGAATTCAGTGAATCATCGAATCTTTGAACGCAC  
ATTGCGCCCCCTTGGTATTCGAGGGGCATGCCTGTTTCGAGCGTCATTTCAACCCTCAAGCTCTGCTTGGTATTGGGCTCC  
GTCTCCACGGACGCGCTCGAAGACCTCGGCGGTGGCGTCTTGCTTCGAGCGTAGTAGAAAACACCTCGCTTTGGAGCG  
CACGGCGTCGCCCCCGGACGAACCTTTGGATTTTCTCAAGGTTGACCTCGGATCAGGTAGGGATACCCGCTGAACTTA  
A

>OL539661\_CREA-DC TPR OL.427\_TEF1-a

GGTGGTATCGATAAGCGTACCATCGAGAAGTTCGAGAAGGTAAGAAAGCTTTTCCTTCCGCTGCACGCACGCTGGGTGCT  
GGGTTGCCGCACTCAATTTGTCTTATCGCTTCGGTGAGGGGCATTTTGGTGGTGGGGTCGGCCCGCGCTAAGCCTTGTTT  
GTGCTTCGGCAAAATCTCCACATCTGGTTTTTTGCGACCGGCGTGCGACCGAAGCGCGCCCCCTCGCCAGACTCACAGCCG  
CACGTGCGACCGGACGCTAACGACCACCAGGAAGCCGCGAGCTCGGCAAGGGTTCCTTCAAGTACGCCTGGGTTCTTGA  
CAAGCTCAAGGCTGAGCGTGAGCGTGGTATCACCATCGACATTGCCCTCTGGAAGTTCGAGACCCCGAAGTACTATGTCA  
CCGTCATCGACGCCCCCGGTACCGTGATTTTCATCAAGAACATGATCACTGGTACCTCCCAGGCCGACTGCGCCATTCTC  
ATCATTGCCGC

>OL539662\_CREA-DC TPR OL.427\_TUB2

ACTGCGCTGCCCCGCTTGTCTTCTACGCGTCCCTGACAGCCCCGCGTCTTGCCCCCGGCTACGACAACGGGGTCAACAC  
CGCTGCGCACTCCTGCTAACATCGTCTTTTCGATCCATAGGTTACCTCCAGACCGGCAATGCGTAAGTCTTCTCACA  
TCCGCCGAAATCGCTGCGTGCCTGACTTTGCCCAGGGTAACCAAATCGGTGCTGCCTTCTGGTTTGTGGCCAAAACAC  
TCCCGCTCCCGCGCCCCCGCTGACGCGAATCGACACCACAGGCAGACCATTTCCGGCGAGCACGGCCTGGACGGCTCTGG  
CGTGTAAGTCTGCGCCATTTCTTGCGCGAATGGCAATGGCTGACCCGAGCAGCTACAATGGCACCTCCGACCTCCAGCT  
CGAGCGCATGAACGTCTACTTCAACGAGGTACTCTCTCATTAATTGCACAAACACGTAAAGTATGGCAATCTTCTGAACG  
CGCAGCAGGCGTCCAACAACAAGTACGTTCTCGTGCCGTCCTCGTCGACCTCGAGCCCGGACCATGGATGCCGTCGCG  
GCCGGCCCCCTTCGGCCAGCTCTTCCGCCCCGACAATTTTGTCTTCGGCCAGTCTGGTGCCGGTAACAACCTGG
