# Supplementary material for: Neofusicoccum mediterraneum Is Involved in a Twig and Branch Dieback of Olive Trees Observed in Salento (Apulia, Italy)
Source: Pathogens. 2022 Jan 2;11(1):53. doi: 10.3390/pathogens11010053 (PMC8780778; doi:10.3390/pathogens11010053)
Supplement: Supplementary file 1 [file pathogens-11-00053-s001.zip]

Archive with 4 entries (4 files):
- Figure S1.pdf
- Figure S2.pdf
- Spreadsheet S1.xlsx
- Tex_Table S1.pdf
