# Supplementary material for: Neofusicoccum mediterraneum Is Involved in a Twig and Branch Dieback of Olive Trees Observed in Salento (Apulia, Italy)
Source: Pathogens. 2022 Jan 2;11(1):53. doi: 10.3390/pathogens11010053 (PMC8780778; doi:10.3390/pathogens11010053)
Supplement: Supplementary file 1 [file pathogens-11-00053-s001.zip › Spreadsheet S1.xlsx]

## Sheet: Foglio1
		Title: Twig and branch dieback of olive trees in Salento (Apulia, Italy) caused by Neofusicoccum mediterraneum Journal name: Pathogens - MDPI Authors: Angela Brunetti, Antonio Matere, Valentina Lumia, Vittorio Pasciuta, Valeria Fusco, Domenico Sansone, Paolo Marangi, Nicola Cristella Francesco Faggioli, Marco Scortichini and Massimo Pilotti Corresponding author: Massimo Pilotti Affiliation: Insti…
		Species	Isolate No.	Host	GenBank accession numbers
					ITS	TEF1-α	β-Tubulin
1		Botryosphaeria dothidea	CBS 115476 = CMW 8000, ex-epitype	Prunus sp.	AY236949	AY236898	AY236927
2		Neofusicoccum arbuti	CBS116131/UW01	Arbutus menziesii	AY819720	KF531792	KF531793
3		N. arbuti	CBS117090/UW13	Arbutus menziesii	AY819724	KF531791	KF531794
4		N. australe	CAA434	Eucalyptus globulus	KT440913	KT440973	KX505927
5		N. australe	CAA455	Eucalyptus globulus	KT440915	KT440975	KX505928
6		N. cordaticola	CBS 123634 = CMW 13992, ex-type	Syzygium cordatum	EU821898	EU821868	EU821838
7		N. cryptoaustrale	LM03	Pistacia lentiscus	KX505912	KX505903	KX505930
8		N. cryptoaustrale	BL34/CAD023	Vitis vinifera	KJ638328	KX505904	KX505931
9		N. dianense	CSF6075 = CGMCC3.20082, ex-type	Eucalyptus urophylla x E. grandis	MT028605	MT028771	MT028937
10		N. eucalypticola	CBS 115679 = CMW 6539, ex-type	Eucalyptus grandis	AY615141	AY615133	AY615125
11		N. eucalyptorum	CAA511	Eucalyptus globulus	KX505907	KX505896	KX505919
12		N. eucalyptorum	CAA709	Eucalyptus globulus	KT440941	KT441001	KX505920
13		N. eucalyptorum	CAA713	Eucalyptus globulus	KT440943	KT441003	KX505921
14		N. hellenicum	CERC 1947 = CFCC 50067, ex-type	Pistacia vera	KP217053	KP217061	KP217069
15		N. hongkongense	CERC2973 = CGMCC3.18749, ex-type	Araucaria cunninghamii	KX278052	KX278157	KX278261
16		N. kwambonambiense	CAA755	Eucalyptus globulus	KT440946	KT441006	KX505917
17		N. lumnitzerae	CBS 139674 = CMW 41469, ex-type	Lumnitzera racemosa	KP860881	KP860724	KP860801
18		N. luteum	CAA628	Fraxinus excelsior	KX505911	KX505902	KX505929
19		N. luteum	CBS110299	Vitis vinifera	AY259091	AY573217	DQ458848
20		N. luteum	CPC 27961	Citrus limon	MW413872	MW419190	MW419253
21		N. macroclavatum	CBS 118223 = CMW 15955 = WAC 12444, ex-type	Eucalyptus globulus	DQ093196	DQ093217	DQ093206
22		N. magniconidium	CSF5876 = CGMCC3.20077, ex-type	Eucalyptus urophylla x E. grandis	MT028612	MT028778	MT028944
23		N. mangiferae	CBS118531/CMW7024	Mangifera indica	AY615185	DQ093221	AY615172
24		N. mediterraneum	CAA001	Pistacia vera	KX505909	KX505899	KX505924
25		N. mediterraneum	CAA002	Pistacia vera	EU017537	KX505900	KX505925
26		N. mediterraneum	CBS121558	Vitis vinifera	GU799463	GU799462	GU799461
27		N. mediterraneum	CPC 27931	Citrus limon	MW413874	MW419192	MW419255
28		N. mediterraneum	BOO068	Olea europaea	GU292642	GU292698	GU292754
29		N. mediterraneum	BOO070	Olea europaea	GU292644	GU292700	GU292756
30		N. mediterraneum	BOF116	Fraxinus sp.	GU292669	GU292725	GU292781
31		N. mediterraneum	BOP156	Pistacia vera	GU292672	GU292728	GU292784
32		N. mediterraneum	BOP162	Pistacia vera	GU292673	GU292729	GU292785
33		N. mediterraneum	BOP757	Pistacia vera	GU292679	GU292735	GU292791
34		N. mediterraneum	SPA9	Pistacia lentiscus	KX505910	KX505901	KX505926
35		N. microconidium	CERC3497 = CGMCC3.18750, ex-type	Eucalyptus urophylla x E. grandis	KX278053	KX278158	KX278262
36		N. ningerense	CSF6028 = CGMCC3.20078, ex-type	Eucalyptus urophylla x E. grandis	MT028613	MT028779	MT028945
37		N. nonquaesitum	IMI500168	Vaccinium corymbosum	JX217819	KX505895	KX505918
38		N. occulatum	CBS 128008 = MUCC 227, ex-type	Eucalyptus grandis	EU301030	EU339509	EU339472
39		N. parviconidium	CSF5667 = CGMCC3.20074, ex-type	Eucalyptus	MT028615	MT028781	MT028947
40		N. parvum (ex N. algeriense)	CAA322	Eucalyptus globulus	KX505906	KX505894	KX505916
41		N. parvum (ex N. algeriense)	CBS137504/ALG1	Vitis vinifera	KJ657702	KX505893	KX505915
42		N. parvum	CBS110301	Vitis vinifera	AY259098	AY573221	EU673095
43		N. parvum	CMW9081	Populus nigra	AY236943	AY236888	AY236917
44		N. parvum	CPC 26119	Citrus sinensis x Poncirus trifoliata	MW413878	MW419196	MW419259
45		N. parvum	UCR-NP2	Vitis vinifera	AORE01001444	AORE01000046	AORE01001255
46		N. pennatisporum	WAC 13153 = MUCC 510, ex-type	Allocasuarina fraseriana	EF591925	EF591976	EF591959
47		N. pistaciae	CBS 595.76, ex-isotype of Camarosporium pistaciae	Pistacia vera	KX464163	KX464676	KX464953
48		N. protearum	CBS 114176 = CPC 1775 = JT 189, ex-type	Leucadendron salignum x L. laureolum	AF452539	KX464720	KX465006
49		N. ribis	CBS 115475 = CMW 7772, ex-type	Ribes vulgare	AY236935	AY236877	AY236906
50		N. ribis	CBS121.26	Ribes rubrum	AF241177	AY236879	AY236908
51		N. sinense	CGMCC3.18315, ex-type	Unknown woody plant	KY350148	KY817755	KY350154
52		N. sinoeucalypti	CERC2005 = CGMCC3.18752, ex-type	Eucalyptus urophylla x E. grandis	KX278061	KX278166	KX278270
53		N. stellenboschiana 1	CBS110864	Vitis vinifera	AY343407	AY343348	KX465047
54		N. stellenboschiana 2	CPC29767	unidentified plant	MT587523	MT592248	MT592740
55		N. terminaliae	CBS 125264 = CMW 26683	Terminalia sericea	GQ471804	GQ471782	KX465053
56		N. ursorum 2	CBS122812	Eucalyptus sp.	KX464227	KX464760	KX465057
57		N. viticlavatum	CBS 112878 = CPC 5044 = JM 86, ex-type	Vitis vinifera	AY343381	AY343342	KX465058
58		N. vitifusiforme	B8	Vitis vinifera	KC469638	KX505897	KX505922
59		N. vitifusiforme	B9	Vitis vinifera	KX505908	KX505898	KX505923
60		N. yunnanense	CSF6142 = CGMCC3.20083, ex-type	Eucalyptus globulus, twigs	MT028667	MT028833	MT028999
		11. Moral, J.; Muñoz-Díez, C.; González, N.; Trapero, A.; Michailides, T.J. Characterization and pathogenicity of Botryosphaeriaceae species collected from olive and other hosts in Spain and California. Phytopathology 2010, 100(12), 1340-51. Doi: 10.1094/PHYTO-12-09-0343 17. Lopes, A.; Phillips, A.J.L.; Alves, A. Mating type genes in the genus Neofusicoccum: mating strategies and usefulness in sp…
